# Supplementary material for: Genome-Wide Identification and Evolutionary Analysis of the SRO Gene Family in Tomato
Source: Front Genet. 2021 Sep 21;12:753638. doi: 10.3389/fgene.2021.753638 (PMC8490783; doi:10.3389/fgene.2021.753638)
Supplement: Supplementary file 1 [file Table2.XLSX]

## Sheet: Sheet1
Table S2. Statistics of the number of different cis-acting elements
species	ABA responsive element					Gibberellin responsive elements			Jasmonate responsive elements		Auxin responsive elements					Salicylic acid responsive element				Ethylene responsive element	total
	ABRE	ABRE4	ABRE3a	AT~ABRE	DRE core	P-box	GARE-motif	TATC-box	TGACG-motif	CGTCA-motif	TGA-element	AuxRE	AuxRR-core	TGA-box	E2Fb	as-1	TCA-element	SARE	TCA	ERE
S.lycopersicum	35	7	7	0	1	3	2	1	15	15	4	1	0	3	0	15	4	0	3	15	131
S.pimpinellifolium	29	3	3	1	0	5	5	2	7	7	3	1	1	0	0	7	6	1	3	9	93
S.pennellii	34	7	7	0	1	4	2	1	12	12	6	0	3	1	0	12	4	0	4	11	121
S.lycopersicum var. cerasiforme	35	8	8	0	1	1	4	2	18	18	4	0	2	1	1	18	12	0	8	16	157
S.lycopersicoides	4	1	1	0	0	1	0	2	9	9	2	0	1	0	0	9	7	1	2	5	41
total	136	25	25	1	3	14	13	7	59	59	19	2	6	5	1	59	33	1	19	56	543
species	Light-responsive element
	3-AF1 binding site	AAAC-motif	ACE	AE-box	AT1-motif	ATCT-motif	Box 4	Box II	chs-CMA1a	chs-CMA2a	GA-motif	Gap-box	GATA-motif	G-Box	G-box	GT1-motif	I-box	LAMP-element	LS7	MRE	Sp1	TCCC-motif	TCT-motif
S.lycopersicum	2	0	2	3	0	0	22	1	1	0	4	0	2	4	18	4	1	0	1	5	0	3	7
S.pimpinellifolium	3	1	4	4	1	2	18	0	0	0	0	0	9	10	15	11	1	1	0	7	0	5	13
S.pennellii	1	1	1	2	1	2	17	1	1	0	1	0	4	5	18	7	1	0	0	3	0	2	3
S.lycopersicum var. cerasiforme	4	0	2	1	1	3	38	1	3	2	6	1	8	5	19	20	5	1	1	9	0	3	14
S.lycopersicoides	1	0	0	8	0	0	8	0	1	0	2	0	8	2	5	3	1	1	0	3	1	0	13
total	10	2	9	17	3	7	102	3	6	2	13	1	31	26	73	45	9	3	2	26	1	13	48
species	Growth responsive element								total
	AACA_motif	CAT-box	CCGTCC-box	circadian	GCN4_motif	HD-Zip 1	MSA-like	O2-site
S.lycopersicum	0	1	0	2	2	0	0	3	8
S.pimpinellifolium	0	8	0	4	3	1	2	5	23
S.pennellii	1	1	1	1	2	0	2	3	11
S.lycopersicum var. cerasiforme	0	1	0	2	4	0	0	6	13
S.lycopersicoides	0	1	0	2	2	1	0	6	12
total	1	12	1	11	13	2	4	23	67
species	Stress responsive element									total
	ARE	W box	MBS	STRE	LTR	TC-rich repeats	MBSI	WUN-motif	DRE
S.lycopersicum	12	6	1	5	2	4	0	4	2	36
S.pimpinellifolium	23	7	9	18	4	4	0	5	0	70
S.pennellii	17	13	5	6	4	6	1	14	1	67
S.lycopersicum var. cerasiforme	19	11	4	15	6	7	1	11	1	75
S.lycopersicoides	15	8	7	6	4	3	0	4	1	48
total	84	45	25	48	18	21	2	37	5	285
